# Supplementary material for: Correlation between Traits of Emotion-Based Impulsivity and Intrinsic Default-Mode Network Activity
Source: Hindawi journal article supplement (doi:10.1155/2017/9297621), 2017-01-01
Supplement: f1 [file 9297621.f1.pdf]

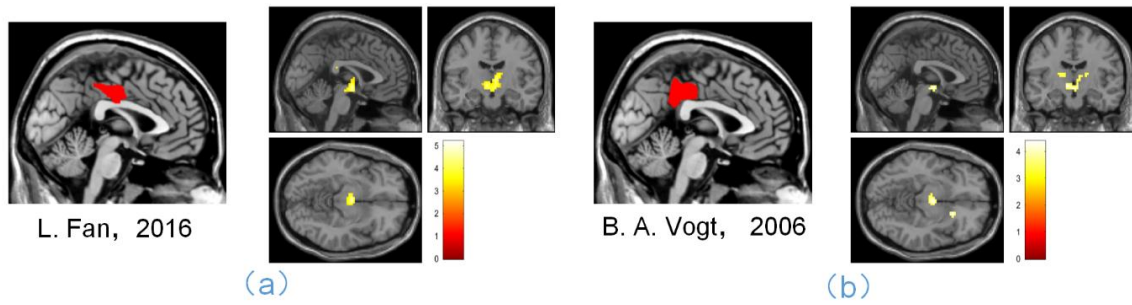

Supplementary Figure 1 the brain regions which functional connectivity with dorsal posterior cingulate cortex showed significant association with trait urgency ( $P_{\text{FWE}} = 0.05$ , family-wise error (FWE) correction). (a) Seed region was defined from the Human Brainnetome Atlas (bilateral CG-6 region, L. Fan, 2016). (b) Seed region was anatomically defined by bilateral dorsal posterior cingulate cortex (B. A. Vogt, 2006).
